1 **Self-controlled practice and nudging during structural learning of a novel control interface**

2

3

4 **Mei-Hua Lee, Shanie A.L. Jayasinghe**

5 Department of Kinesiology, Michigan State University, East Lansing, MI, USA

6

7

8 **Corresponding author:**

9

10 Dr. Mei-Hua Lee

11 Assistant Professor

12 Department of Kinesiology

13 Michigan State University

14 308 W Circle Dr

15 East Lansing MI 48824

16 Phone: 517-353-4652

17 Email: [mhlee@msu.edu](mailto:mhlee@msu.edu)

18

19

20 Word count: 4194 (Intro through Discussion)

21 Figures: 4

22 Tables: 0

23 **Abstract**

24 Self-controlled practice schedules have been shown to enhance motor learning in several  
25 contexts, but their effectiveness in structural learning tasks, where the goal is to eventually learn  
26 an underlying structure or rule, is not well known. Here we examined the use of self-controlled  
27 practice in a novel control interface requiring structural learning. In addition, we examined the  
28 effect of ‘nudging’ – i.e., whether altering task difficulty could influence self-selected strategies,  
29 and hence facilitate learning. Participants wore four inertial measurement units (IMUs) on their  
30 upper body and the goal was to use motions of the upper body to move a screen cursor to  
31 different targets presented on the screen. The structure in this task that had to be learned was  
32 based on the fact that the signals from the IMUs were linearly mapped to the x- and y- position  
33 of the cursor. Participants (N = 62) were split into 3 groups (random, self-selected, nudge) based  
34 on whether they had control over the sequence in which they could practice the targets. To test  
35 whether participants learned the underlying structure, participants were tested both on the trained  
36 targets, as well as novel targets that were not practiced during training. Results showed that  
37 during training, the self-selected group showed shorter movement times relative to the random  
38 group, and both self-selected and nudge groups adopted a strategy of tending to repeat targets.  
39 However, in the test phase, we found no significant differences in task performance between  
40 groups, indicating that structural learning was not reliably affected by the type of practice. In  
41 addition, nudging participants by adjusting task difficulty did not show any significant benefits to  
42 overall learning. These results suggest that although self-controlled practice influenced practice  
43 structure and facilitated learning, it did not provide any additional benefits relative to practicing  
44 on a random schedule in this task.

45

46

47 **Keywords:** motor learning, body-machine interface, redundancy, coordination, practice

48 schedule, contextual interference

## 49 INTRODUCTION

50 Given that practice time is often limited in real-world tasks, designing practice schedules that  
51 maximize learning within a short period of training is crucial for efficient use of the learner's  
52 time and effort. A key element in this regard involves determining who is in control of the  
53 practice schedule. In this context, self-controlled practice schedules - i.e. allowing the learner to  
54 determine aspects of practice, has emerged as an important means by which learning can be  
55 facilitated. The benefits of self-controlled practice have been shown to be fairly robust across a  
56 large number of tasks and practice manipulations (1–9), and have been attributed to many  
57 factors, including increased active involvement from the learner (10), increased autonomy (11–  
58 13), and the role of informational processes (14).

59  
60 In spite of this evidence for benefits of self-controlled practice in a large number of contexts, its  
61 utility in a specific type of learning - structural learning (or schema learning) has received  
62 comparatively little attention (15–17). Structural learning in the motor context involves  
63 extraction of a general rule of a mapping during practice, which can then effectively be used for  
64 generalization. For example, when learning how to drive, the goal of the novice driver is not to  
65 learn specific movements of the steering wheel per se (e.g., turn the wheel by 90 degrees), but to  
66 learn the underlying 'structure' or 'rule' of how steering wheel movements map on to the  
67 movement of the car. Learning this structure is essential for generalization – i.e., being able to  
68 control the car in novel situations that were never practiced during training. This type of  
69 structural learning becomes even more important in the context of learning to control novel  
70 assistive devices. Consider for example an amputee learning to control a prosthetic arm using  
71 muscle activity or inertial measurement units (18). In this case, the underlying rule of how the

72 body motion/muscle activity maps to motion of the prosthetic arm may not be as intuitive as the  
73 mapping of steering wheel movements to a car's motion; this situation places an even greater  
74 emphasis on the design of efficient practice schedules to learn this mapping. It is important to  
75 note that even though prior studies on self-controlled practice have used 'transfer' tests as a  
76 measure of generalization of learning (3,5), these have been primarily used in rather well-learned  
77 tasks (such as key pressing or throwing) where the underlying schema may already be present  
78 through prior experience. In contrast, our focus in this study was to use a novel virtual task  
79 where the structure could only be learned through practice.

80

81 One important element for enhancing structural learning is the need for variability in practice  
82 conditions (15,17). However, it is unclear how this variability needs to be incorporated into the  
83 practice schedule. On one hand, there is extensive evidence that practice sequences benefit from  
84 contextual interference – i.e. learning is generally facilitated when task variations are distributed  
85 randomly across trials, instead of being blocked together (19–21). Moreover, there is also  
86 evidence that self-controlled determination of the practice sequence benefits learning (22,23).  
87 However, on the other hand, these experiments with self-controlled practice schedules have been  
88 typically done in the context of multiple tasks (such as different sequences), with no underlying  
89 structure connecting these tasks. A feature of self-controlled learning that may be problematic  
90 here is that although it may benefit autonomy, it typically reduces the random structure of  
91 practice because participants tend to engage in more 'blocked' practice by repeating targets (24).  
92 As a result, it may foster more 'instance-based' learning (i.e. how to solve a particular variation),  
93 and may potentially be detrimental to ultimately learning the underlying rule or schema.

94

95 A related issue with respect to self-controlled strategies is whether learning can be further  
96 enhanced by ‘nudging’ (25) – i.e. given that self-selection strategies could sometimes potentially  
97 be suboptimal because participants may focus on immediate short-term gains in performance  
98 over long-term learning benefits (26), is it possible to push learners to choose more optimal  
99 strategies that benefit learning? In the context of motor behavior, the term ‘nudge’ is closely  
100 related to the concept of ‘constraints’ (Newell, 1986) in that they both attempt to alter behavior,  
101 but with the main difference being that nudges do not ‘forbid’ any options or significantly alter  
102 incentives to choose one option (25). In the current context, given prior evidence that self-  
103 controlled practice schedules may encourage too many repetitions of a difficult task (making it  
104 similar to blocked practice), we examined the effect of nudging the learner toward more random  
105 practice by manipulating task difficulty so that the perceived task difficulty across all variations  
106 was similar.

107

108 In this study, we examined the effect of self-controlled practice schedules on structural learning.  
109 We used a novel body-machine interface (BoMI) paradigm (27), where participants had to  
110 control movements of the upper body to control a screen cursor (28). Importantly, this mapping  
111 of upper body movements to cursor motion was designed to be non-intuitive so that participants  
112 could only discover the structure through practice. Practice involved virtual reaching movements  
113 to different targets presented on a screen. We examined whether (i) a self-selected practice  
114 schedule (where participants could control which targets they reached to) was superior compared  
115 to a random practice schedule where participants did not have such control, and (ii) if nudging by  
116 adjusting task difficulty influenced learning relative to self-selected strategies without nudging.

117

118 **METHODS**

119 *Participants*

120 We recruited 62 healthy young adults for this experiment (33 females, 29 males; age  $24 \pm 4$   
121 years). We obtained written informed consent from all participants prior to conducting the  
122 experiment, and procedures were approved by the IRB at Northwestern University and Michigan  
123 State University.

124

125 *Experimental protocol*

126 We utilized the experimental design and setup described in earlier studies (28,29) and summarize  
127 the main points for completeness.

128

129 Four IMUs (3-space, YEI Technology, Ohio, USA) were placed, on the posterior and anterior  
130 ends of the acromioclavicular joint of both sides of the body using Velcro hooks to a customized  
131 vest worn by each participant. Each IMU recorded 2D (roll and yaw) orientation of the segment  
132 it was attached to at a sampling rate of 50 Hz.

133

134 Participants were asked to stay seated on a chair placed 23" in front of a computer screen. The  
135 chair had a backrest but participants did not have any other restrictions on motion. We performed  
136 an initial calibration to map the IMU signals to the cursor. Briefly, participants performed 'free  
137 exploration' movements with their upper body within a comfortable range of motion. We then  
138 performed principal components analysis (PCA) on these data, and extracted the first 2 principal  
139 components – the first controlled the x-axis motion, and the second controlled the y-axis motion.

140

141 Participants were asked to move their upper body in order to move a cursor and reach a target  
142 presented on the computer screen as fast as possible, and as close to the center of the target as  
143 possible. The circular target (radius 2.2 cm) was placed at a radial distance of 11.5 cm from the  
144 screen center. The cursor had to be inside the target for 500 ms in order for the trial to be  
145 completed. The next target could be selected only after the previous target was reached.

146

147 The experiment consisted of a virtual center-out reaching task divided into 11 blocks: pre-test,  
148 training blocks 1-4, mid-test, training blocks 5-8, and the post-test. During the testing blocks, the  
149 target appeared three times in each of eight directions (4 cardinal directions, 4 diagonals),  
150 resulting in 24 trials per testing block. During the training blocks, the target appeared only along  
151 the four cardinal directions, for a total of 20 trials per training block. The number of trials at each  
152 target depended on the group that the participant was assigned to. The task was custom-made on  
153 Matlab® software (Mathworks Inc., Natick, MA, USA).

154

155

156

### 157 *Experimental design*

158 Participants were divided into one of three groups to test three different practice schedules: 1)  
159 Random (20 participants), 2) Self-selected (21 participants), 3) Nudge (21 participants). All  
160 groups completed the same pre-, mid-, and post-test blocks; however, the type of training given  
161 during the training blocks differed across the three groups (Fig 1).

162



163 The Random group had the four practice targets presented in a randomized manner during each  
164 training block trial i.e. participants had no control over which target to practice on each trial.  
165 There was also a constraint that all 4 targets had to be performed at least once before a target  
166 could repeat. In the Self-selected group, participants were allowed to choose which of the four  
167 training targets they wanted to move their cursor to in each trial. At the start of each trial,  
168 participants were shown all 4 targets simultaneously on the screen and participants subsequently  
169 decided which target they wanted to move to for that trial. In the Nudge group, participants also  
170 had the choice of which target they wanted to practice moving to (similar to the Self-selected  
171 group); however, the size of the targets presented on the screen differed to make the perceived  
172 difficulty of all targets relatively equal (i.e. difficult targets were made larger in size, and easier  
173 targets smaller in size). Based on a participant's performance in the pre-test, we computed their  
174 mean normalized Euclidean error for each of the 4 cardinal targets at 1 second into the  
175 movement. Then, for training blocks 1 to 4, the target for which the error was biggest was made  
176 to appear bigger than usual (25% increase in radius), and the target for which the error was  
177 smallest was made to appear smaller than usual (25% decrease in radius). The remaining two  
178 targets stayed at the usual size. For training blocks 5 to 8, the same procedure was repeated based  
179 on the Euclidean errors from the mid-test.

180

181 ----- Insert Figure 1 about here -----

182

### 183 **Data Analysis**

184 All data processing and analyses were conducted using Matlab (Mathworks<sup>®</sup> Inc., Natick, MA,  
185 USA).

186

187 *Task performance*

188 The primary performance outcome measure was movement time, which was determined to be  
189 the time it took the cursor to leave the center of the screen and reach the target successfully i.e.  
190 stay inside the target for 500 ms. Reduction in movement time was an indication of improved  
191 task performance. Because participants could not proceed to the next target without reaching the  
192 prior target in our protocol, no spatial error metrics were computed.

193

194 A secondary performance measure was the normalized path length, which showed how quickly  
195 participants learned to make smooth, straight movements of the cursor to the target. The  
196 normalized path length was measured as the distance traveled by the cursor divided by the  
197 straight-line distance between the screen center and the target. Reduction in normalized path  
198 would indicate straighter paths, with a value of 1 indicating a perfect straight line.

199

200 *Strategy*

201 Since the self-selected groups were given the freedom to choose the target(s) they wanted to  
202 practice on, and the Nudge group was chosen to make the ‘difficult’ target easier (by making it  
203 bigger in size), we quantified the strategy that participants used by (i) calculating the number of  
204 times they selected the ‘difficult’ target and (ii) calculating the probability of repeating a target  
205 (which examines the degree to which practice was ‘blocked’).

206

207 *Statistical analysis*

208 Training. To first establish that participants improved during training, we used a 2 x 3 (Block x  
209 Group) repeated measures ANOVA, where Block (Training blocks 1 & 8) was the within-  
210 subjects factor and Group (Random/Self-selected/Nudge) was the between-subjects factor.

211

212 Test. To assess structural learning, we used a 3 x 3 (Block x Group) repeated measures ANOVA  
213 separately on each of the performance outcome measures during the testing block. Block  
214 (Pre/Mid/Post) was the within-subjects factor, and Group was the between-subjects factor. For  
215 post hoc comparisons, we primarily focused on two comparisons related to our aims – (i) self-  
216 selected vs. random (to examine the effect of self-controlled strategy), and (ii) self-selected vs.  
217 nudge (to examine the effect of nudging).

218

219 Violations of sphericity were corrected with the Greenhouse-Geisser correction when needed.  
220 Significance levels were set at  $P < 0.05$ . All statistical analyses were performed in JASP (30).

221

222

223

224

## 225 **Results**

226

227 Data from three participants were removed from the data analysis due to incomplete data sets or  
228 errors in the calibration files. Therefore, the final sample size was 19 participants for the random  
229 group, 19 for the self-selected group and 21 from the nudge group.

230 *Task performance*

231 Movement Time

232 Training. Training resulted in decreases in movement time, and a group difference. There was a  
233 significant main effect of block ( $F(1,56) = 92.74, P < .001$ ), which indicated a decrease in  
234 movement time from the first to the last block, and a main effect of group ( $F(2,56) = 3.165, P =$   
235  $.050$ ). Planned comparisons showed that the random group had longer movement times than the  
236 self-selected group ( $P = .017$ ), but there were no differences between the self-selected and nudge  
237 groups ( $P = .415$ ). The block x group interaction was not significant ( $F(2,56) = 2.720, P = .075$ ).

238

239 Test. All three groups exhibited a reduction in movement time over the course of the  
240 experiment, but there were no group differences (Figure 2A). There was a significant main effect  
241 of block ( $F(1.051,58.849) = 99.6, P < .001$ ). Post hoc tests using the Bonferroni correction  
242 showed that movement time reduced significantly ( $P < 0.001$ ) across the three testing blocks.  
243 There was no significant main effect of group ( $F(2,56) = 0.016, P = .984$ ), or block x group  
244 interaction ( $F(2.102,58.849) = 0.046, P = .96$ ). Splitting the movement times by target direction  
245 showed similar trends in both the cardinal and diagonal directions (Figure 2B).

246

247

248 Path Length.

249 Training. Training resulted in decreases in path length, but no group differences. There was a  
250 significant main effect of block ( $F(1,56) = 53.63, P < .001$ ), which indicated a decrease in path  
251 length from the first to the last block. The main effect of group ( $F(2,56) = 1.663, P = .199$ ), and  
252 the block x group interaction ( $F(2,56) = 1.756, P = .182$ ) were not significant.

253

254 Test. Similar to the movement time results, there was a decrease in path length i.e. cursor  
255 trajectories became straighter with practice, but there were no group differences (Figure 3).  
256 There was a significant main effect of block ( $F(1,042,58.348) = 68.062, P < 0.001$ ), indicating  
257 that movement trajectories became significantly straighter over the course of testing. The main  
258 effect of group ( $F(2,56) = 0.416, P = 0.662$ ), and block x group interaction ( $F(2,084,58.348) =$   
259  $0.183, P = 0.842$ ) were not significant.

260

261 ---- Insert Figures 2 and 3 about here ----

262

### 263 *Practice Strategy in Self-controlled groups*

264 For the analysis of practice strategy which involved only the self-selected and nudge groups, we  
265 did not have full target sequence data from one participant in the self-selected group– therefore  
266 all analyses are reported for the remaining 39 participants (18 self-selected, 21 nudge)

267

268 When we examined the probability of choosing the ‘difficult target’, we found that overall both  
269 self-controlled groups showed lower than 25% probability of selection, indicating that they  
270 tended to avoid the difficult targets (one sample t-test,  $P = .009$  in blocks 1-4,  $P < .001$  in blocks  
271 5-8). There was a Block x Group interaction ( $F(1,37) = 7.010, P = .012$ ). Analyses of the  
272 interaction showed that the Nudge group chose the ‘difficult’ target more often initially in  
273 learning and then decreased this frequency with practice, whereas the Self-selected group did not  
274 have a significant change in the frequency of the selection of difficult target with practice. The  
275 main effects of Block ( $F(1,37) = 0.371, P = .546$ ) and Group ( $F(1,37) = 0.008, P = .928$ ) were  
276 not significant.

277

278 When we examined the structuring of practice (in terms of whether they chose a more ‘blocked’  
279 or ‘random’ schedule), we found that overall both self-controlled groups showed more  
280 repetitions than the random group (which had 0% by definition). There was a main effect of  
281 block ( $F(1,37) = 7.212, P = .011$ ) indicating that participants tended to block practice more  
282 initially during practice (i.e. blocks 1-4) compared to later in practice (blocks 5-8). The main  
283 effect of group ( $F(1,37) = 0.813, P = .373$ ) and the block x group interaction ( $F(1,37) = 3.208, P$   
284  $= .081$ ) was not significant.

285

286 Finally, to examine if the practice strategy in terms of target repetitions affected performance, we  
287 correlated the number of repetitions in all 8 training blocks and correlated to it the movement  
288 time at the post-test. We found a positive correlation ( $r = 0.483, P = .002, 95\% \text{ CI: } [0.198$   
289  $0.693]$ ) indicating that more repetitions during practice (i.e. more blocked practice) was  
290 associated with increased movement time (i.e. lower task performance).

291

292 ---- Insert Figure 4 here ----

293

## 294 **DISCUSSION**

295 The goal of the study was to address the role of self-controlled practice in a structural learning  
296 task. Participants learned to control a novel interface which required motion of the upper body to  
297 move a screen cursor to different targets. Participants trained on a set of targets, and we  
298 examined structural learning during test phases that involved generalization to novel targets. We  
299 examined if (i) a self-selected practice schedule resulted in better learning compared to a random

300 practice schedule where participants did not have control, and (ii) if nudging by adjusting task  
301 difficulty influenced learning relative to a self-selected strategy without nudging.

302

303 For the first question, our results showed that although the self-controlled group exhibited shorter  
304 movement times early during training, there were no statistically significant differences between  
305 the random and self-controlled group during the test conditions (which was our measure of  
306 structural learning). This was true both for the training and test targets, indicating that the groups  
307 did not differ either in retention or generalization. One trivial possibility for these non-significant  
308 results is simply that any potential differences between groups was eliminated by a ‘floor effect’  
309 in terms of the performance – i.e. movement times had reduced to a minimum possible limit by  
310 the end of training. However, we consider this unlikely as an explanation since the mid-tests  
311 (which were done in the middle of the training session) also showed the same patterns as the  
312 post-test.

313

314 These results are somewhat inconsistent with a majority of experiments on self-controlled  
315 practice that have demonstrated beneficial learning effects (13,31). A critical difference from  
316 these prior studies is that the current study focused on structural learning – i.e., practicing  
317 variations so that the focus was not simply on improving performance in the trained tasks, but  
318 also on learning the underlying structure in order to generalize to other targets. In contrast, prior  
319 studies on practice sequencing with self-controlled practice have typically employed different  
320 task variations, with no underlying rule or structure connecting these task variations (22,23). In  
321 the context of structural learning, self-controlled practice may create a potential tradeoff –  
322 participants may tend to focus excessively on improving performance on the training targets (as

323 indicated by the increased repetition and avoidance of the difficult targets in the Strategy  
324 analyses), however, this focus on short-term performance may result in more ‘blocked’ practice,  
325 which could negate some of the other benefits of self-controlled practice. Supporting this claim,  
326 we found a positive correlation between the number of repetitions and the final movement time  
327 on the post-test, indicating that participants who self-selected a more ‘blocked’ practice schedule  
328 showed worse task performance in the post-test. These results suggest that self-controlled  
329 practice schedules may not always be optimal in terms of practice structure, especially in the  
330 context of learning novel tasks. Approaches such as ‘restricted’ self-control, where participants  
331 face a mix of self-controlled and experimenter-imposed conditions may provide the optimal  
332 learning environment in such cases (8)

333

334 For the second question, we used a Nudge group that was designed to follow a practice schedule  
335 similar to that of the self-selected group, but with the target sizes presented during the training  
336 blocks adjusted based on performance on the preceding testing block. Specifically, by making  
337 the more difficult targets appear easier (and vice versa), we anticipated that we could ‘nudge’  
338 participants into achieving a more even distribution of repetitions across all targets; hence,  
339 addressing the issue of instance-based learning previously described. Results showed that the  
340 Nudge group did successfully alter the strategy relative to the Self-selected group in terms of  
341 increasing the choice of the difficult target initially in learning. However, our results showed no  
342 reliable effect of this manipulation on any of the performance metrics relative to the Self-selected  
343 group which was not nudged. One reason for this null result might be that we only evaluated  
344 target difficulty twice during the entire practice schedule - at the onset of practice and at the  
345 halfway mark (i.e. at the pre-test and mid-test). A more frequent update of task difficulty (e.g.,



346 once per training block) may have been more effective to ensure that participants were practicing  
347 on the most difficult target for them at that time. Also, we adjusted target sizes by a fixed amount  
348 based simply on the rank-ordering of the Euclidean error (i.e. without considering the magnitude  
349 of the differences). Using a more sophisticated method - for e.g. by using Fitts' law (32) to  
350 control the index of difficulty - may provide a better manipulation that is more uniform across  
351 participants. Given that the Nudge group had an effect on the strategy used, this strategy of  
352 'nudging' participants toward specific choices deserves greater attention in future motor learning  
353 studies since control of the choice architecture provides a way to use the experimenter's  
354 knowledge of optimal learning strategies and guide the learner toward better strategies while still  
355 retaining their autonomy.

356

357 There are a few caveats that need to be addressed –first, we did not have a yoked group in this  
358 study which would have received the same order of targets as that chosen by the self-controlled  
359 groups. The yoked group is considered the standard control group in several self-controlled  
360 practice studies and allows for isolating the effect of 'autonomy'; however, in the context of our  
361 research question being whether it is critical for the learner to have control over the practice  
362 sequence during learning, the appropriate control group is the random group which did not have  
363 control over the sequence. The utility of the yoked group as a control group arises only in cases  
364 where the self-control group outperforms the random group; this is because the yoked group can  
365 be used to distinguish if the benefit of self-control is due to the choice of a better practice  
366 sequence (in which case self-control should be similar to yoked) or the fact that the self-control  
367 group has autonomy (in which case self-control should be better than yoked). However, in the  
368 current study, there was no evidence of the self-control group outperforming the random group.

369 In addition, from a practical standpoint, the random group serves a better control group because  
370 it would likely be the default practice schedule for learning this task. A second caveat is that our  
371 measures of learning were all within the same day from pre-test to post-test, similar to an  
372 ‘immediate’ retention test. Although it is possible that an immediate retention test is likely  
373 affected by ‘temporary’ effects indicative of a learning-performance distinction (33), these  
374 temporary effects usually differentially affect one group only when the manipulation has a  
375 drastic effect on performance (e.g. fatigue or guidance). In our case, the manipulation did not  
376 have any effects on performance even during learning, which makes it unlikely that temporary  
377 effects differentially affected one group. In any case, inference from the current work is  
378 primarily about short-term ‘within-session learning’, and not about long-term retention or  
379 consolidation. A third caveat was that we did not have other measures of motivation or  
380 perceptions of competence (11,34), and so we have restricted our discussion mostly to task  
381 performance.

382

383 In summary, we found that although self-controlled practice schedules had distinct effects on  
384 practice strategy, self-controlled practice schedules did not provide any additional performance  
385 benefits relative to a random experimenter-determined practice schedule in a structural learning  
386 task. Understanding how to enhance structural learning of complex control interfaces may be a  
387 critical step in developing better practice schedules both for novel human-computer interfaces as  
388 well as for current assistive devices.

389

390 **ACKNOWLEDGMENTS**

391 We would like to thank Ali Farshschiansadegh for assistance in programming the interface, and  
392 members of the Sensorimotor Development lab for assisting with data collection. We would also  
393 like to thank Rajiv Ranganathan for discussions on an earlier draft of this manuscript. This  
394 material is based upon work supported by the National Science Foundation under Grant nos.  
395 1654929 and 1703735.

## 396 REFERENCES

- 397 1. Janelle CM, Kim J, Singer RN. Subject-controlled performance feedback and learning of a  
398 closed motor skill. *Percept Mot Skills*. 1995 Oct;81(2):627–34.
- 399 2. Wulf G, Toole T. Physical assistance devices in complex motor skill learning: benefits of a  
400 self-controlled practice schedule. *Res Q Exerc Sport*. 1999 Sep;70(3):265–72.
- 401 3. Chiviawosky S, Wulf G. Self-controlled feedback: does it enhance learning because  
402 performers get feedback when they need it? *Res Q Exerc Sport*. 2002 Dec;73(4):408–15.
- 403 4. Chiviawosky S, Wulf G. Self-controlled feedback is effective if it is based on the learner’s  
404 performance. *Res Q Exerc Sport*. 2005 Mar;76(1):42–8.
- 405 5. Post PG, Fairbrother JT, Barros JAC. Self-controlled amount of practice benefits learning of  
406 a motor skill. *Res Q Exerc Sport*. 2011 Sep;82(3):474–81.
- 407 6. Ali A, Fawver B, Kim J, Fairbrother J, Janelle CM. Too much of a good thing: random  
408 practice scheduling and self-control of feedback lead to unique but not additive learning  
409 benefits. *Front Psychol*. 2012;3:503.
- 410 7. Carter MJ, Patterson JT. Self-controlled knowledge of results: age-related differences in  
411 motor learning, strategies, and error detection. *Hum Mov Sci*. 2012 Dec;31(6):1459–72.
- 412 8. Andrieux M, Boutin A, Thon B. Self-Control of Task Difficulty During Early Practice  
413 Promotes Motor Skill Learning. *J Mot Behav*. 2016;48(1):57–65.
- 414 9. Williams CK, Tseung V, Carnahan H. Self-Control of Haptic Assistance for Motor Learning:  
415 Influences of Frequency and Opinion of Utility. *Front Psychol*. 2017;8:2082.
- 416 10. Janelle CM, Barba DA, Frehlich SG, Tennant LK, Cauraugh JH. Maximizing performance  
417 feedback effectiveness through videotape replay and a self-controlled learning  
418 environment. *Res Q Exerc Sport*. 1997 Dec;68(4):269–79.
- 419 11. Sanli EA, Patterson JT, Bray SR, Lee TD. Understanding Self-Controlled Motor Learning  
420 Protocols through the Self-Determination Theory. *Front Psychol*. 2012;3:611.
- 421 12. Ste-Marie DM, Carter MJ, Law B, Vertes K, Smith V. Self-controlled learning benefits:  
422 exploring contributions of self-efficacy and intrinsic motivation via path analysis. *J Sports  
423 Sci*. 2016 Sep;34(17):1650–6.
- 424 13. Wulf G, Lewthwaite R. Optimizing performance through intrinsic motivation and attention  
425 for learning: The OPTIMAL theory of motor learning. *Psychon Bull Rev*. 2016 Oct  
426 1;23(5):1382–414.

- 427 14. Barros JAC, Yantha ZD, Carter MJ, Hussien J, Ste-Marie DM. Examining the impact of error  
428 estimation on the effects of self-controlled feedback. *Hum Mov Sci.* 2019 Feb 1;63:182–  
429 98.
- 430 15. Braun DA, Aertsen A, Wolpert DM, Mehring C. Motor task variation induces structural  
431 learning. *Curr Biol CB.* 2009 Feb 24;19(4):352–7.
- 432 16. Braun DA, Mehring C, Wolpert DM. Structure learning in action. *Behav Brain Res.* 2010 Jan  
433 20;206(2):157–65.
- 434 17. Schmidt RA. A schema theory of discrete motor skill learning. *Psychol Rev.*  
435 1975;82(4):225–60.
- 436 18. Resnik LJ, Acluche F, Borgia M, Cancio J, Latlief G, Phillips S, et al. EMG pattern recognition  
437 compared to foot control of the DEKA Arm. *PLOS ONE.* 2018 Oct 18;13(10):e0204854.
- 438 19. Hall KG, Magill RA. Variability of practice and contextual interference in motor skill  
439 learning. *J Mot Behav.* 1995;27(4):299–309.
- 440 20. Lee TD, Magill RA, Weeks DJ. Influence of Practice Schedule on Testing Schema Theory  
441 Predictions in Adults. *J Mot Behav.* 1985 Sep 1;17(3):283–99.
- 442 21. Wulf G, Lee TD. Contextual interference in movements of the same class: differential  
443 effects on program and parameter learning. *J Mot Behav.* 1993 Dec;25(4):254–63.
- 444 22. Keetch KM, Lee TD. The effect of self-regulated and experimenter-imposed practice  
445 schedules on motor learning for tasks of varying difficulty. *Res Q Exerc Sport.* 2007  
446 Dec;78(5):476–86.
- 447 23. Wu WFW, Magill RA. Allowing learners to choose: self-controlled practice schedules for  
448 learning multiple movement patterns. *Res Q Exerc Sport.* 2011 Sep;82(3):449–57.
- 449 24. Huang VS, Shadmehr R, Diedrichsen J. Active learning: learning a motor skill without a  
450 coach. *J Neurophysiol.* 2008 Aug;100(2):879–87.
- 451 25. Thaler R H, Sunstein C R. *Nudge: improving decisions about health, wealth, and happiness.*  
452 New Haven: Yale University Press; 2008.
- 453 26. Bjork RA, Dunlosky J, Kornell N. Self-Regulated Learning: Beliefs, Techniques, and Illusions.  
454 *Annu Rev Psychol.* 2013;64(1):417–44.
- 455 27. Casadio M, Ranganathan R, Mussa-Ivaldi FA. The body-machine interface: a new  
456 perspective on an old theme. *J Mot Behav.* 2012;44(6):419–33.
- 457 28. Lee M-H, Farshchiansadegh A, Ranganathan R. Children show limited movement  
458 repertoire when learning a novel motor skill. *Dev Sci.* 2017;e12614.

- 459 29. Lee M-H, Ranganathan R, Kagerer FA, Mukherjee R. Body-machine interface for control of  
460 a screen cursor for a child with congenital absence of upper and lower limbs: a case  
461 report. *J Neuroengineering Rehabil.* 2016 Mar 24;13:34.
- 462 30. JASP Team. JASP (Version 0.9)[Computer software] [Internet]. 2018. Available from:  
463 <https://jasp-stats.org/>
- 464 31. Wulf G. Self-controlled practice enhances motor learning: implications for physiotherapy.  
465 *Physiotherapy.* 2007 Jun 1;93(2):96–101.
- 466 32. Fitts PM. The information capacity of the human motor system in controlling the  
467 amplitude of movement. *J Exp Psychol.* 1954;47(6):381–91.
- 468 33. Katak SS, Winstein CJ. Learning-performance distinction and memory processes for  
469 motor skills: a focused review and perspective. *Behav Brain Res.* 2012 Mar 1;228(1):219–  
470 31.
- 471 34. Grand KF, Bruzi AT, Dyke FB, Godwin MM, Leiker AM, Thompson AG, et al. Why self-  
472 controlled feedback enhances motor learning: Answers from electroencephalography and  
473 indices of motivation. *Hum Mov Sci.* 2015 Oct;43:23–32.

474

475

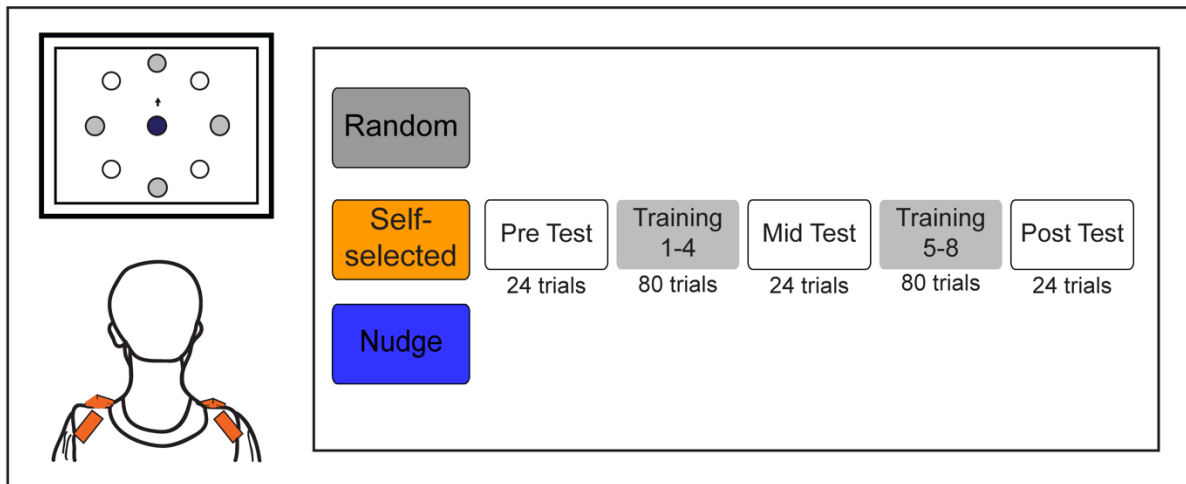

476

477 Figure 1. Schematic of experimental setup (left) and protocol (right). Participants wore IMUs  
478 (indicated by the little rectangles on the shoulders) and learned to move a screen cursor to  
479 different targets presented on the screen. Three groups of participants (Random, Self-selected,  
480 Nudge) practiced the task in a single session. In the eight training blocks (Training 1-8), only the  
481 cardinal direction targets were presented. In the three test blocks (Pre/Mid/Post), both cardinal  
482 and diagonal direction targets were presented to assess generalization and structural learning.

483

484

485

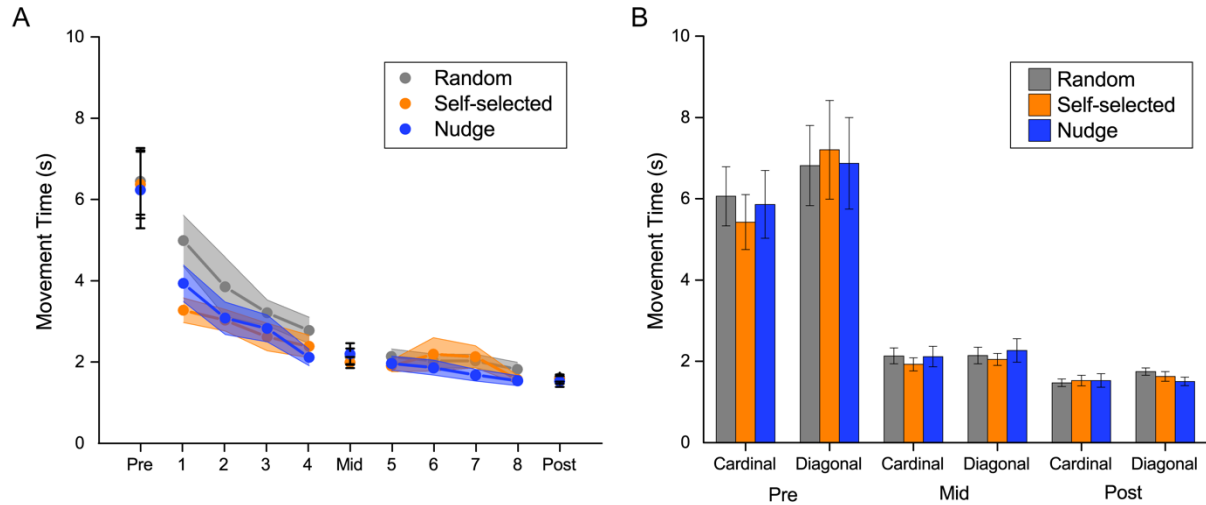

486

487 Figure 2. (A) Average movement time as a function of practice for the three groups. All groups  
488 decreased their movement time with practice but there were no statistically significant  
489 differences in movement time across the three groups during the test blocks. (B) Movement time  
490 in the test blocks split by target direction (cardinal/diagonal). Both directions showed similar  
491 changes with practice, indicating structural learning.

492



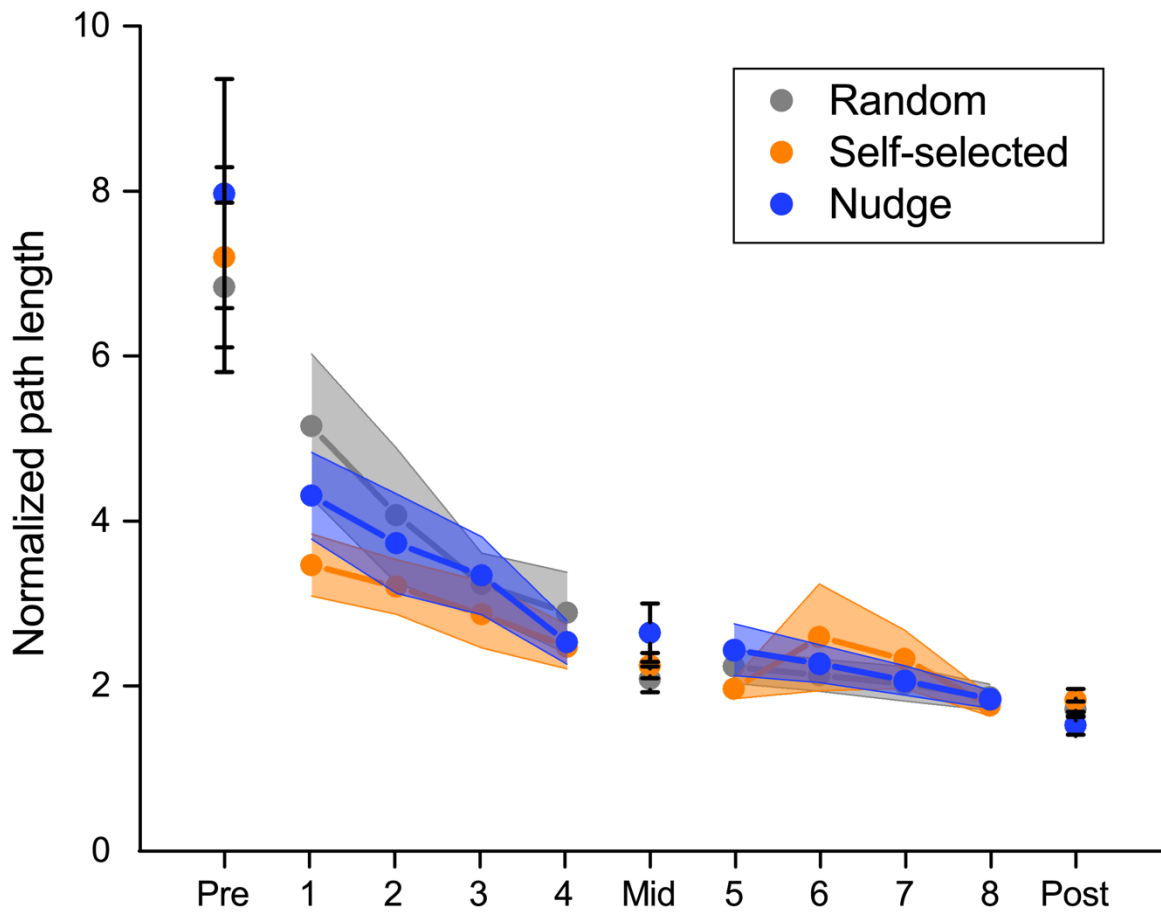

493

494 Figure 3. Normalized path length as a function of practice for the three groups. Path length  
495 reduced significantly over the course of the experiment, indicating straighter paths. However,  
496 similar to the movement time results, there was no significant difference between groups during  
497 the test blocks.

498

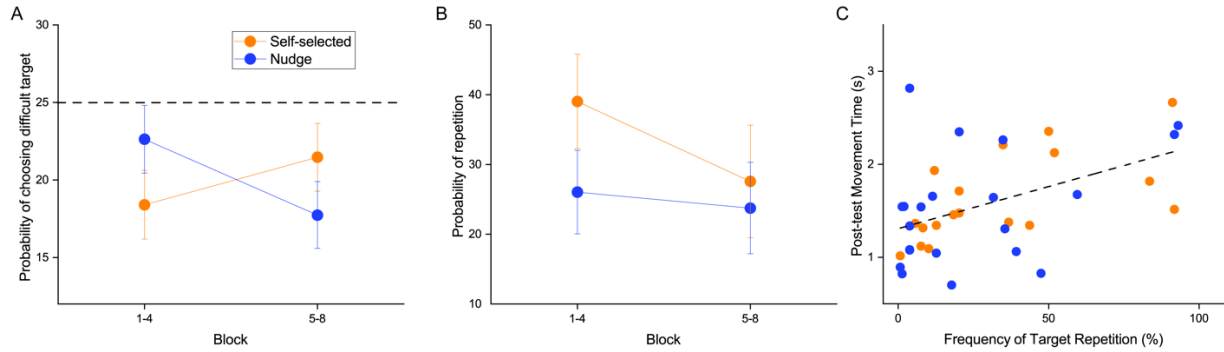

499

500 Figure 4. Practice strategies used by the Self-selected, and Nudge groups. (A) Practice of the  
501 difficult target. The Nudge group, which had its difficult target increased in size, showed a  
502 higher probability of practicing the difficult target relative to the Self-selected group early on in  
503 practice (Blocks 1-4), but this difference disappeared with later in practice. (B) Number of  
504 repetitions during practice. Both Self-selected and Nudge groups showed increased repetition  
505 early in practice. However, the Self-selected group showed an increased tendency for blocked  
506 practice (i.e. larger number of repetitions) early in practice, but this changed in the later blocks of  
507 practice. (C) Correlation between frequency of repetitions (computed over all 8 blocks of  
508 practice) and the movement time on the post-test. A positive correlation indicated that more  
509 repetition during training (i.e., a more blocked practice schedule) was associated with higher  
510 movement times on the post-test.

511

512

513
